# Supplementary material
Source: PubMed Central journal article supplement (PMC7482274)
Supplement: rspb20201191supp1.pdf [file rspb20201191supp1.pdf]

Supplementary materials for MS “Pollen grain size associated with pollinator feeding strategy ” by Kai HAO et al.

Figure S1 to S4; Table S1 to S3

Figure S1.

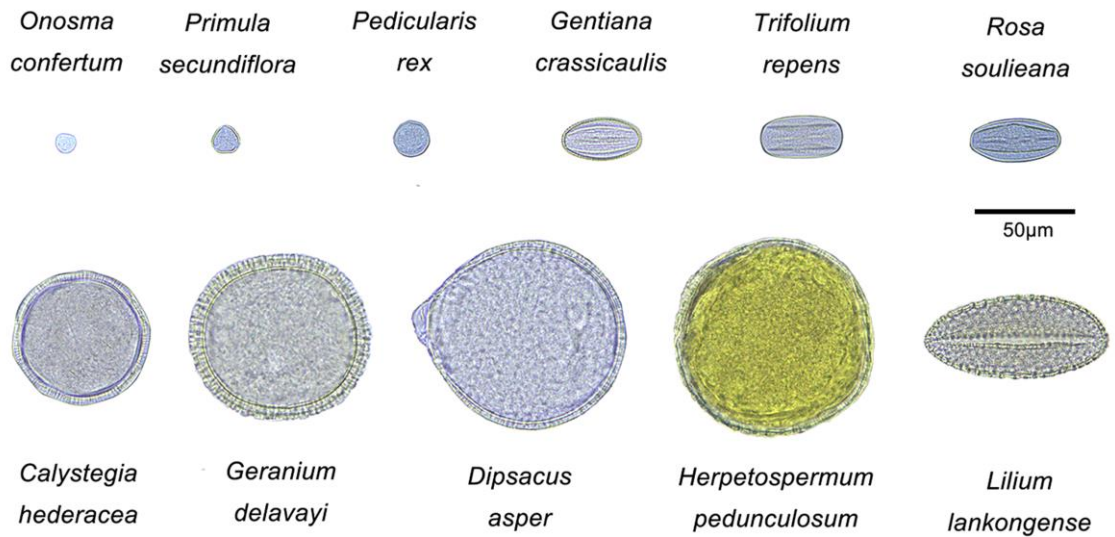

**Fig. S1.** Pollen samples of 11 species from Shangri-La, southwest China under a light microscope, showing pollen grain size ranging from small (upper six species) to large (bottom five species). Scale bar = 50 µm.

**Figure S2**

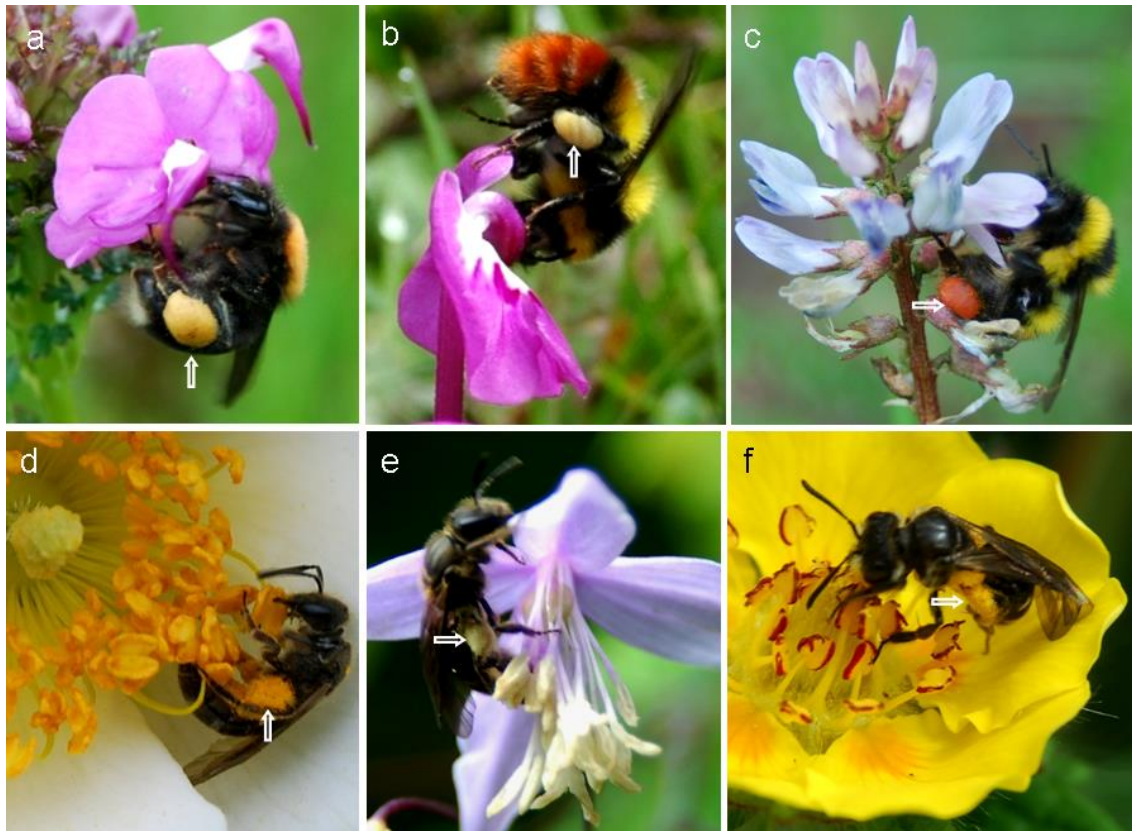

**Fig. S2.** Bumblebees (upper line) or solitary bees (bottom line) positively collecting pollen into corbiculae or scopae on the hind legs (arrows), leaving less pollen for fertilization. *Bombus festivus* collecting pollen from *Pedicularis cephalantha* (a); *Bombus friseanus* collecting pollen from *Pedicularis siphonantha* (b) and *Astragalus pullus* (c); halictid bee collecting pollen from *Rosa soulieana* (d); *Thalictrum delavayi* (e) and *Potentilla lancinata* (f).

**Figure S3**

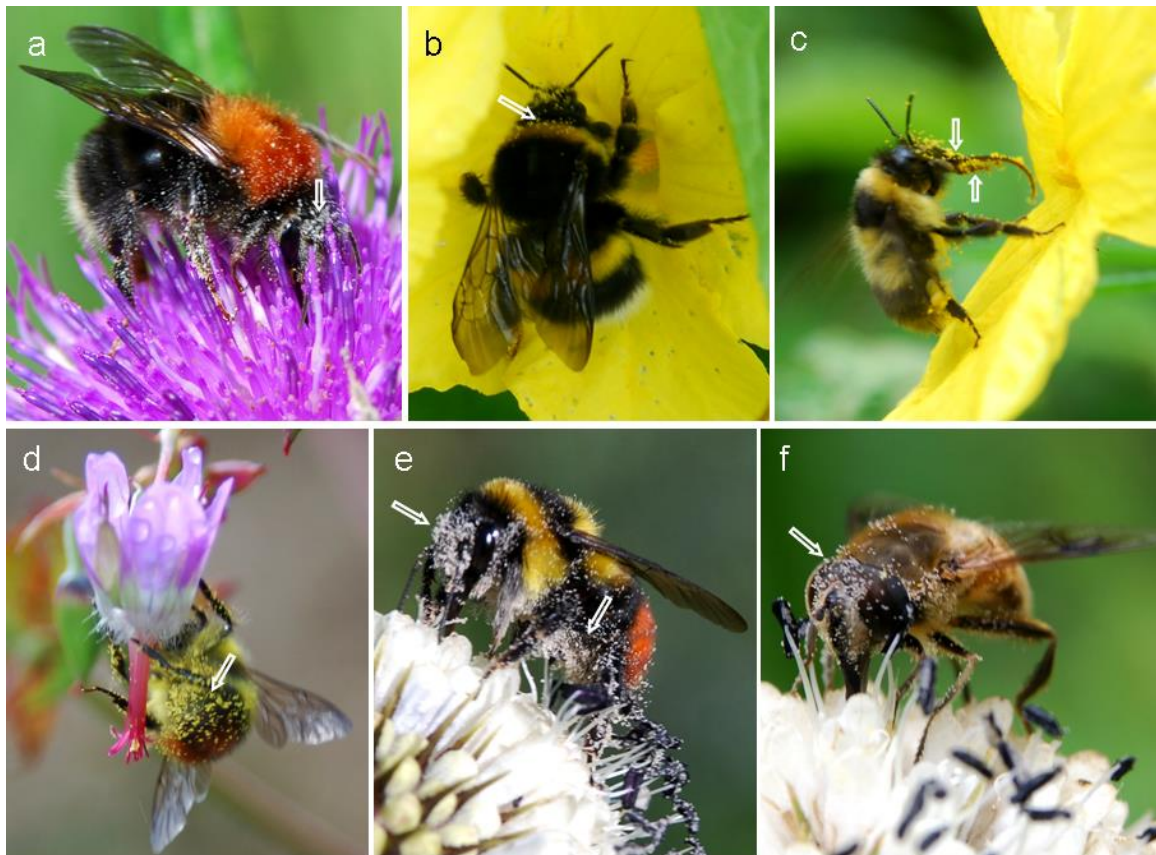

**Fig. S3.** Pollen grains passively placed on the floral visitors' bodies were not groomed and packed into pollen baskets, and were likely to be delivered to the next flowers visited. These plant species are characterized by relatively large pollen grains, perhaps because relaxed selection by pollen collection permits plants to produce fewer but larger pollen grains. While nectar is sucked from *Cirsium shansiense*, the white pollen accumulates passively on the head, ventral surface and legs of *Bombus festivus* (a); *Bombus lucorum* (b) and another bumblebee (c) collecting nectar from male flowers of *Herpetospermum pedunculatum*. Note that the yellow pollen grains are passively placed on the head or tongue; lots of yellow pollen from *Geranium delavayi* passively placed on the bumblebee's abdomen but not groomed (d); both the bumblebee *Bombus friseanus* (e) and a syrphid fly *Eristalis tenax* (f) rejecting white pollen grains from *Dipsacus asper*. Arrows mark passive accumulation of pollen on the pollinator body. Compared to plants shown in Figure S2, no pollen loads are visible on the bumblebees' hind legs when they are visiting plants illustrated here.

**Figure S4**

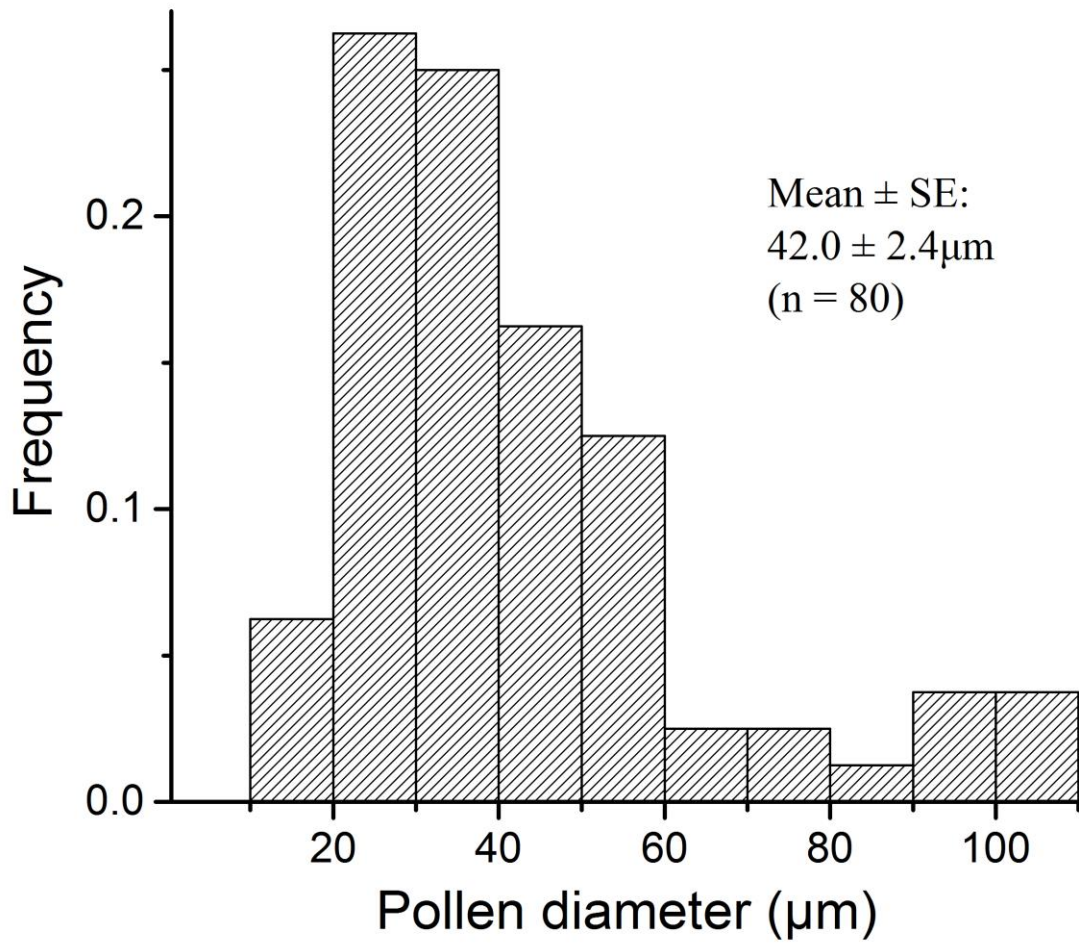

**Fig. S4.** Variation in pollen diameter in the 80 flowering species from natural communities in Shangri-La field station, southwest China.

**Table S1.** Three hypotheses proposed for the evolution of pollen grain size and collected evidence of interspecific comparisons of pollen-related traits in the studied plant communities. A null (allometry) hypothesis and two functional hypotheses including pre-pollination pollinator foraging and post-pollination stylar-interaction are considered.

| Hypothesis          | Evidence                                       |                                                    |                                                 |
|---------------------|------------------------------------------------|----------------------------------------------------|-------------------------------------------------|
|                     | Correlation between flower size and grain size | Association between pollen foraging and grain size | Correlation between style length and grain size |
| Allometry           | Support                                        | Reject                                             | Support                                         |
| Pollinator foraging | Neither reject nor support                     | Support                                            | Neither reject nor support                      |
| Stylar interactions | Neither reject nor support                     | Reject                                             | Support                                         |

**Table S2.** Dataset of floral traits (mean value) and number of sampled flowers per species, pollen grain diameter and pollen production per flower, pollinator foraging pollen behaviour and observation period in 80 flowering species at Shangri-La field station, southwest China, and DNA sequence code downloaded from the Genebank (NCBI).

**Table S3.** The results of trait correlations from 21 publications between pollen size and style length or stigma depth, and/or flower size, or pollen number. The phylogenetic independent contrast (PIC) analysis and measurement of flower size were involved only in a few lineages.

Table S2. Dataset of floral traits (mean value) and number of sampled flowers per species, pollen grain diameter and pollen production per flower, pollinator foraging pollen behaviour and observation period in 80 flowering species at Shangri-La field station, southwest China, and DNA sequence code downloaded from the Genebank (NCBI).

| Family         | Taxon                          | Substituted taxon (if the origin taxon was not found in Genebank) | Surface area of corolla (mm <sup>2</sup> ) | Sample size (herbarium specimen) | Style length (mm) | Sampled flowers (n) | Pollen size (um) | Sampled flowers (n) | Pollen number | Sampled flowers (n) | Pollen exposure | Grooming pollen behaviour | Main pollinator          | Total observation time | Observation period | ITS      | mat K    | rbc L    |
|----------------|--------------------------------|-------------------------------------------------------------------|--------------------------------------------|----------------------------------|-------------------|---------------------|------------------|---------------------|---------------|---------------------|-----------------|---------------------------|--------------------------|------------------------|--------------------|----------|----------|----------|
| Amaryllidaceae | <i>Allium condensatum</i>      |                                                                   | 18.2                                       | 21                               | 5.9               | 1                   | 44.0             | 5                   | 41851         | 20                  | Yes             | No                        | bumblebee                | 120h                   | 2010. 08           | GQ181098 | HQ690342 | HQ690466 |
| Amaryllidaceae | <i>Allium macranthum</i>       |                                                                   | 53.0                                       | 21                               | 7.6               | 1                   | 38.8             | 5                   | 58795         | 20                  | Yes             | No                        | bumblebee                | 120h                   | 2010. 08           | GQ181072 | HQ690297 | KP207702 |
| Apiaceae       | <i>Heracleum candicans</i>     |                                                                   | 4.5                                        | 1                                | 2.8               | 1                   | 37.5             | 5                   |               |                     | Yes             | No                        | fly                      | 1h                     | 2019. 08           | HQ686368 | FJ986061 | KY683844 |
| Apiaceae       | <i>Torilis scabra</i>          |                                                                   | 1.6                                        | 1                                | 0.7               | 1                   | 33.8             | 5                   |               |                     | Yes             | No                        | Syrphidae/<br>Halictidae | 0.5h                   | 2019. 08           | MH712597 |          | MK932714 |
| Asphodelaceae  | <i>Hemerocallis fulva</i>      |                                                                   | 962.2                                      | 1                                | 47.4              | 1                   | 103.9            | 20                  | 41905         | 20                  | Yes             | No                        | butterfly                | 4h                     | 2018. 08           | JF972939 | KM360813 |          |
| Asteraceae     | <i>Anaphalis nepalensis</i>    |                                                                   | 10.5                                       | 1                                | 5.0               | 1                   | 25.3             | 5                   |               |                     | No              | No                        | fly                      | 3.5h                   | 2019. 08           | EF107657 | MH116528 | MH116046 |
| Asteraceae     | <i>Aster oreophilus</i>        | <i>Aster amellus</i>                                              | 16.7                                       | 1                                | 7.1               | 10                  | 26.4             | 30                  | 5177          | 20                  | Yes             | No                        | Syrphidae                | 6h                     | 2019. 08           | LC027373 | KJ746181 |          |
| Asteraceae     | <i>Cirsium shansiense</i>      | <i>Cirsium arvense</i>                                            | 29.8                                       | 1                                | 30.9              | 9                   | 50.2             | 20                  | 7643          | 20                  | Yes             | No                        | bumblebee                | 6h                     | 2019. 08           | AY254532 | HQ593238 | JX848406 |
| Asteraceae     | <i>Ixeridium chinense</i>      | <i>Ixeridium dentatum</i>                                         | 20.4                                       | 21                               | 9.0               | 1                   | 38.3             | 20                  | 3518          | 20                  | Yes             | No                        | bumblebee                | 3.5h                   | 2019. 08           | AB766220 |          | LC364387 |
| Asteraceae     | <i>Ligularia lankongensis</i>  |                                                                   | 17.5                                       | 1                                | 6.4               | 1                   | 43.3             | 5                   | 2779          | 20                  | Yes             | No                        | bumblebee                | 120h                   | 2010. 08           | KY979100 | JF954351 | JF942262 |
| Asteraceae     | <i>Ligularia dictyoneura</i>   |                                                                   | 18.0                                       | 1                                | 9.6               | 7                   | 35.3             | 20                  | 1676          | 20                  | Yes             | No                        | bumblebee                | 2h                     | 2019. 08           | JF976814 |          | JF942253 |
| Asteraceae     | <i>Picris hieracioides</i>     |                                                                   | 27.6                                       | 21                               | 9.2               | 1                   | 35.3             | 20                  | 2770          | 20                  | Yes             | No                        | bumblebee                | 4h                     | 2019. 08           | KT249837 | JN896100 | KF196021 |
| Asteraceae     | <i>Saussurea costus</i>        |                                                                   | 54.0                                       | 1                                | 15.8              | 1                   | 52.5             | 20                  | 11107         | 20                  | Yes             | No                        | bumblebee                | 6h                     | 2019. 08           | EU239685 | KX344518 | JX944489 |
| Asteraceae     | <i>Taraxacum mongolicum</i>    |                                                                   | 25.3                                       | 1                                | 8.6               | 10                  | 32.8             | 20                  | 3004          | 20                  | Yes             | No                        | bees                     | 4h                     | 2019. 08           | EF114672 | JN407106 | JN407256 |
| Balsaminaceae  | <i>Impatiens amplexicaulis</i> | <i>Impatiens capensis</i>                                         | 84.7                                       | 1                                | 8.3               | 1                   | 35.0             | 20                  | 85000         | 20                  | No              | Yes                       | bumblebee                | 1.5h                   | 2019. 08           | AY712664 | MG225075 | KT178138 |
| Boraginaceae   | <i>Onosma confertum</i>        | <i>Onosma visianii</i>                                            | 91.0                                       | 21                               | 15.9              | 10                  | 11.8             | 20                  | 710880        | 20                  | No              | Yes                       | bumblebee                | 120h                   | 2010. 08           | GU827159 |          |          |

|                 |                                    |                              |        |    |      |    |       |           |        |    |     |     |                         |       |                                    |            |          |          |
|-----------------|------------------------------------|------------------------------|--------|----|------|----|-------|-----------|--------|----|-----|-----|-------------------------|-------|------------------------------------|------------|----------|----------|
| Brassicaceae    | <i>Thlaspi arvense</i>             |                              | 8.9    | 1  | 2.1  | 1  | 26.8  | 5         |        |    | No  | Yes | Halictidae              | 2h    | 2019. 08                           | AY254532   | AF144360 | JQ933501 |
| Campanulaceae   | <i>Adenophora capillaris</i>       |                              | 108.1  | 21 | 25.1 | 9  | 45.1  | 20        | 20795  | 20 | No  | No  | moth                    | 18h   | 2009. 08,<br>2010. 08,<br>2011. 08 | KF175324   |          | KT970148 |
| Campanulaceae   | <i>Adenophora khasiana</i>         |                              | 394.7  | 21 | 25.3 | 1  | 53.0  | 5         | 56097  | 20 | Yes | No  | bumblebee/<br>moth      | 18h   | 2009. 08,<br>2010. 08,<br>2011. 08 | KF175308   | KF175291 |          |
| Campanulaceae   | <i>Codonopsis convolvulacea</i>    |                              | 1860.3 | 1  | 9.1  | 9  | 62.3  | 5         | 94600  | 20 | Yes | No  | bees                    | 1h    | 2019. 08                           | KY071089   | KC282735 | KC282764 |
| Campanulaceae   | <i>Cyananthus delavayi</i>         | <i>Cyananthus macrocalyx</i> | 244.4  | 21 | 12.6 | 1  | 57.3  | 5         | 16949  | 20 | No  | No  | bumblebee               | 120h  | 2010. 08                           | JF976208.1 | KC880573 | KT970175 |
| Campanulaceae   | <i>Platycodon grandiflorus</i>     |                              | 1336.7 | 1  | 11.9 | 1  | 50.0  | 5         | 146880 | 20 | Yes | No  | bumblebee               | 1.5h  | 2019. 08                           | KC282682   | EU713251 | AY655156 |
| Caprifoliaceae  | <i>Dipsacus asper</i>              | <i>Dipsacus asperoides</i>   | 29.6   | 21 | 14.0 | 50 | 72.1  | 20        | 2037   | 20 | Yes | No  | bumblebee               | 120h  | 2010. 08                           | EU925568   |          | KT845953 |
| Caprifoliaceae  | <i>Dipsacus chinensis</i>          |                              | 20.1   | 1  | 14.7 | 50 | 102.5 | reference | 2465   | 20 | Yes | No  | bumblebee               | 120h  | 2010. 08                           | EU925569   |          |          |
| Caprifoliaceae  | <i>Pterocephalus hookeri</i>       |                              | 86.3   | 21 | 10.2 | 1  | 96.5  | 5         | 3262   | 20 | Yes | No  | bumblebee               | 120h  | 2010. 08                           | AY236186   | AF446916 | AF446946 |
| Caryophyllaceae | <i>Psammosilene tunicoides</i>     |                              | 15.8   | 1  | 3.0  | 1  | 39.0  | 5         |        |    | Yes | No  | fly                     | 4h    | 2019. 08                           | JN589122   | JN589222 | JF943758 |
| Caryophyllaceae | <i>Silene gracilicaulis</i>        |                              | 103.2  | 21 | 20.9 | 30 | 50.0  | 20        | 11896  | 20 | Yes | No  | moth                    | 12h   | 2017.08,<br>2018.08                | KX757532   | FJ589530 |          |
| Caryophyllaceae | <i>Silene yunnanensis</i>          | <i>Silene acaulis</i>        | 254.5  | 21 | 19.7 | 30 | 37.0  | 20        | 24472  | 20 | Yes | No  | butterfly/<br>bumblebee | 18h   | 2017.08,<br>2018.08,<br>2019.08    | KX757505   | MK164832 | KF602214 |
| Caryophyllaceae | <i>Stellaria yunnanensis</i>       | <i>Stellaria media</i>       | 20.1   | 21 | 2.0  | 1  | 33.0  | 20        | 6471   | 20 | Yes | No  | Syrphidae               | 120h  | 2010. 08                           | JN589063   | HM850779 | HM850386 |
| Convolvulaceae  | <i>Calystegia hederacea</i>        |                              | 1021.7 | 1  | 13.3 | 1  | 79.2  | 20        |        |    | Yes | No  | bumblebee               | 10h   | 2019. 08                           | MH364384   |          | LC085875 |
| Cucurbitaceae   | <i>Herpetospermum pedunculatum</i> |                              | 1209.6 | 1  | 18.6 | 20 | 106.1 | 20        | 16500  | 20 | Yes | No  | bumblebee/<br>hawkmoth  | > 20h | 2018. 08,<br>2019. 08              |            | DQ536687 | DQ535818 |
| Cucurbitaceae   | <i>Thladiantha dubia</i>           |                              | 505.9  | 1  | 9.5  | 1  | 46.5  | 5         |        |    | Yes | Yes | bumblebee               | > 8h  | 2018. 08                           | MH710708   | DQ536740 | DQ535733 |
| Fabaceae        | <i>Astragalus Pullus</i>           | <i>Astragalus alpinus</i>    | 44.4   | 1  | 8.3  | 8  | 21.1  | 20        | 17822  | 10 | No  | Yes | bumblebee               | 120h  | 2010. 08                           | KX954891   | KX955060 | KM360658 |
| Fabaceae        | <i>Lotus corniculatus</i>          |                              | 122.3  | 21 | 16.9 | 1  | 20.1  | 20        | 52601  | 20 | No  | Yes | bumblebee               | 6.5h  | 2019. 08                           | DQ312207   | JN894450 | KM360864 |
| Fabaceae        | <i>Tibetia himalaica</i>           |                              | 115.0  | 1  | 5.9  | 1  | 32.5  | 5         | 2622   | 10 | No  | Yes | bumblebee               | 120h  | 2010. 08                           | KX021440   | KX021514 | JQ933348 |
| Fabaceae        | <i>Trifolium pratense</i>          |                              | 29.3   | 21 | 12.8 | 6  | 57.3  | 5         | 1297   | 20 | No  | Yes | bumblebee               | 120h  | 2010. 08                           | AF053171   | KP230743 | HM850419 |

|               |                                  |                                |        |    |      |    |      |    |        |    |     |     |           |        |                                    |          |          |          |
|---------------|----------------------------------|--------------------------------|--------|----|------|----|------|----|--------|----|-----|-----|-----------|--------|------------------------------------|----------|----------|----------|
| Fabaceae      | <i>Trifolium repens</i>          |                                | 41.3   | 1  | 8.8  | 1  | 28.9 | 20 | 4256   | 20 | No  | Yes | bumblebee | 120h   | 2010. 08                           | EU036988 | AF522131 | KM361020 |
| Fabaceae      | <i>Vicia bungei</i>              |                                | 224.0  | 1  | 17.8 | 1  | 46.0 | 5  | 10858  | 10 | No  | Yes | bumblebee | 120h   | 2010. 08                           | JX506192 | JX505845 |          |
| Fabaceae      | <i>Vicia sepium</i>              |                                | 80.7   | 1  | 10.1 | 6  | 46.8 | 5  | 11100  | 10 | No  | Yes | bumblebee | 120h   | 2010. 08                           | MH711085 | JN896140 | KF602195 |
| Gentianaceae  | <i>Gentiana crassicaulis</i>     |                                | 183.0  | 1  | 12.4 | 1  | 25.5 | 20 | 46435  | 20 | Yes | Yes | bumblebee | 120h   | 2010. 08                           | MF506957 | KC861277 | KJ947509 |
| Geraniaceae   | <i>Geranium delavayi</i>         |                                | 76.0   | 21 | 9.9  | 4  | 92.9 | 20 | 4008   | 20 | Yes | No  | bumblebee | 120h   | 2010. 08                           | MH117555 |          | MH116194 |
| Geraniaceae   | <i>Geranium sibiricum</i>        |                                | 35.9   | 1  | 2.5  | 1  | 58.6 | 5  | 665    | 20 | Yes | No  | bumblebee | 120h   | 2010. 08                           | DQ309044 |          |          |
| Lamiaceae     | <i>Clinopodium megalanthum</i>   | <i>Clinopodium macrostemum</i> | 27.2   | 1  | 8.2  | 1  | 44.3 | 5  |        |    | No  | No  | bumblebee | 120h   | 2010. 08                           | JQ669083 | MK601824 | MK573374 |
| Lamiaceae     | <i>Clinopodium repens</i>        | <i>Clinopodium vulgare</i>     | 17.4   | 1  | 8.3  | 9  | 45.8 | 15 |        |    | No  | No  | bumblebee | 120h   | 2010. 08                           | DQ667324 | AY840153 | KM360725 |
| Lamiaceae     | <i>Galeopsis bifida</i>          |                                | 31.5   | 1  | 9.1  | 1  | 39.0 | 5  |        |    | No  | No  | bumblebee | 120h   | 2010. 08                           | EU827106 | JN894038 | KM360796 |
| Lamiaceae     | <i>Lamium amplexicaule</i>       |                                | 61.7   | 1  | 12.0 | 1  | 39.5 | 5  |        |    | Yes | No  | bumblebee | 120h   | 2010. 08                           | JX073974 | JN894206 | Z37399   |
| Lamiaceae     | <i>Nepeta laevigata</i>          | <i>Nepeta cataria</i>          | 43.0   | 1  | 14.6 | 9  | 37.5 | 20 |        |    | No  | Yes | bumblebee | 120h   | 2010. 08                           | KF803251 | KT176606 | Z37421   |
| Lamiaceae     | <i>Nepeta stewartiana</i>        | <i>Nepeta straussii</i>        | 132.9  | 1  | 18.1 | 1  | 48.5 | 20 | 5173   | 20 | No  | Yes | bumblebee | 120h   | 2010. 08                           | JF301404 |          |          |
| Lamiaceae     | <i>Origanum vulgare</i>          |                                | 11.0   | 1  | 6.7  | 2  | 21.3 | 5  | 1761   | 10 | Yes | No  | bumblebee | 120h   | 2010. 08                           | DQ667243 | FR719087 | MG223937 |
| Lamiaceae     | <i>Phlomis forrestii</i>         | <i>Phlomis mongolica</i>       | 59.7   | 21 | 9.0  | 1  | 27.0 | 20 | 39540  | 20 | Yes | Yes | bumblebee | > 2h   | 2019.08                            |          | HQ839711 | HM590103 |
| Lamiaceae     | <i>Prunella vulgaris</i>         |                                | 28.6   | 21 | 12.2 | 5  | 40.9 | 20 | 3753   | 20 | No  | Yes | bumblebee | 120h   | 2010. 08                           | AY506653 | FJ395426 | AY395556 |
| Lamiaceae     | <i>Salvia przewalskii</i>        |                                | 665.6  | 21 | 36.3 | 5  | 63.9 | 20 | 21116  | 20 | No  | No  | bumblebee | 120h   | 2010. 08                           | KC473256 | KC473388 | KC473329 |
| Lamiaceae     | <i>Scutellaria hypericifolia</i> | <i>Scutellaria baicalensis</i> | 235.4  | 1  | 19.9 | 7  | 25.8 | 5  | 14148  | 20 | No  | No  | bumblebee | 120h   | 2010. 08                           | KJ025067 | HQ676586 | HQ676582 |
| Lamiaceae     | <i>Stachys kouyangensis</i>      | <i>Stachys cretica</i>         | 37.1   | 1  | 11.5 | 9  | 26.6 | 20 | 24728  | 20 | No  | No  | bumblebee | 120h   | 2010. 08                           | KF577385 | HQ911554 | HQ902767 |
| Liliaceae     | <i>Lilium lankongense</i>        | <i>Lilium duchartrei</i>       | 2337.4 | 1  | 45.4 | 20 | 80.3 | 20 | 459107 | 20 | Yes | No  | butterfly | > 20h  | 2017. 08,<br>2018. 08,<br>2019. 08 | HM045429 |          | HQ692259 |
| Liliaceae     | <i>Lilium lancifolium</i>        |                                | 4731   | 1  | 45.2 | 20 | 91.3 | 20 |        |    | Yes | No  | butterfly | > 20h  | 2019.08                            | HQ724825 | KM085639 | AB034937 |
| Orchidaceae   | <i>Spiranthes sinensis</i>       |                                | 16.1   | 1  | 3.0  | 1  | 55.0 | 5  |        |    | No  | No  | bumblebee | > 20h  | 2019.08                            | MF286494 | LT600870 | JF972913 |
| Orobanchaceae | <i>Pedicularis cephalantha</i>   |                                | 206.9  | 1  | 36.4 | 20 | 36.8 | 20 | 70352  | 25 | No  | Yes | bumblebee | > 100h | 2017. 08,<br>2018. 08,<br>2019. 08 | JN252741 | JF955087 | JF942976 |
| Orobanchaceae | <i>Pedicularis confertiflora</i> |                                | 77.7   | 1  | 24.9 | 20 | 30.3 | 20 | 36423  | 25 | No  | Yes | bumblebee | > 100h | 2017. 08,<br>2018. 08,<br>2019. 08 | JN252745 | JX091329 | JF943221 |



|                |                                 |                              |       |    |      |    |      |    |        |    |     |     |                         |        |                              |          |          |          |
|----------------|---------------------------------|------------------------------|-------|----|------|----|------|----|--------|----|-----|-----|-------------------------|--------|------------------------------|----------|----------|----------|
| Orobanchaceae  | <i>Pedicularis densispica</i>   |                              | 100.1 | 1  | 19.2 | 20 | 16.1 | 20 | 124786 | 25 | No  | Yes | bumblebee               | > 100h | 2017. 08, 2018. 08, 2019. 08 | AY155290 | JF955140 | KT022733 |
| Orobanchaceae  | <i>Pedicularis dichotoma</i>    |                              | 59.2  | 1  | 26.2 | 20 | 25.8 | 20 | 40489  | 25 | No  | Yes | bumblebee               | > 100h | 2017. 08, 2018. 08, 2019. 08 | JN252754 | JF955144 | JF943034 |
| Orobanchaceae  | <i>Pedicularis rex</i>          |                              | 288.2 | 1  | 41.3 | 20 | 20.8 | 20 | 330536 | 25 | No  | Yes | bumblebee               | > 100h | 2017. 08, 2018. 08, 2019. 08 | MH117641 | JF955275 | KF011759 |
| Orobanchaceae  | <i>Pedicularis siphonantha</i>  |                              | 183.7 | 1  | 64.4 | 20 | 40.5 | 20 | 23007  | 25 | No  | Yes | bumblebee               | > 100h | 2017. 08, 2018. 08, 2019. 08 | JN252798 | JF955315 | JF943208 |
| Orobanchaceae  | <i>Pedicularis tricolor</i>     |                              | 321.8 | 1  | 82.7 | 20 | 32.1 | 20 | 67353  | 25 | No  | Yes | bumblebee               | > 100h | 2017. 08, 2018. 08, 2019. 08 | JN252806 | JF955358 | JF943252 |
| Polygonaceae   | <i>Fagopyrum esculentum</i>     |                              | 4.9   | 1  | 3.8  | 30 | 44.0 | 20 | 915    | 20 | Yes | No  | fly                     | > 4h   | 2019.08                      | EF653685 | JF829981 | JN187116 |
| Polygonaceae   | <i>Polygonum macrophyllum</i>   | <i>Polygonum aviculare</i>   | 17.5  | 21 | 3.9  | 6  | 51.5 | 5  | 1169   | 20 | Yes | No  | Halictidae              | 120h   | 2010. 08                     | HM357902 | HM357913 | AF297127 |
| Primulaceae    | <i>Androsace bulleyana</i>      | <i>Androsace lactea</i>      | 29.1  | 1  | 1.2  | 1  | 23.8 | 5  |        |    | No  | Yes | Halictidae              | > 4h   | 2019.08                      | AY275069 | KF907850 |          |
| Primulaceae    | <i>Primula poissonii</i>        |                              | 70.5  | 1  | 7.9  | 60 | 15.9 | 60 | 21226  | 20 | No  | No  | bumblebee/<br>butterfly | 120h   | 2010. 08                     | KF934448 | FJ828619 | AF394973 |
| Primulaceae    | <i>Primula secundiflora</i>     |                              | 244.4 | 1  | 11.3 | 60 | 15.7 | 60 | 33491  | 20 | No  | No  | bumblebee/<br>butterfly | 120h   | 2010. 08                     | AF396695 | FJ828613 | HM018353 |
| Ranunculoideae | <i>Aconitum piepunense</i>      | <i>Aconitum carmichaelii</i> | 214.9 | 20 | 6.0  | 1  | 32.5 | 5  | 143865 | 20 | Yes | No  | bumblebee               | > 4h   | 2019.08                      | AY571352 | LC036464 | FJ449849 |
| Ranunculoideae | <i>Cimicifuga foetida</i>       |                              | 2.9   | 1  | 2.6  | 1  | 21.8 | 5  | 23986  | 20 | Yes | No  | Syrphidae               | 120h   | 2010. 08                     | GQ351362 |          |          |
| Ranunculoideae | <i>Clematis akebioides</i>      |                              | 563.9 | 1  | 9.3  | 1  | 25.1 | 20 | 195000 | 20 | No  | Yes | bumblebee               | > 4h   | 2018.08, 2019.08             | GU732574 |          |          |
| Ranunculoideae | <i>Thalictrum delavayi</i>      |                              | 44.0  | 1  | 5.3  | 1  | 21.3 | 20 | 106750 | 20 | Yes | Yes | Halictidae              | 120h   | 2010. 08                     | JX233684 | MH116902 | JX258352 |
| Rosaceae       | <i>Cotoneaster microphyllus</i> |                              | 36.0  | 1  | 2.5  | 1  | 26.0 | 5  |        |    | No  | Yes | bumblebee               | 0.5h   | 2019.08                      | JQ392380 | JQ390958 | JQ391295 |
| Rosaceae       | <i>Potentilla fruticosa</i>     |                              | 140.9 | 1  | 3.1  | 1  | 19.3 | 20 | 104103 | 20 | Yes | Yes | bumblebee               | 2h     | 2019.08                      | AF163478 |          | U06818   |
| Rosaceae       | <i>Potentilla lancinata</i>     |                              | 243.5 | 21 | 3.2  | 1  | 25.2 | 20 | 162480 | 20 | Yes | Yes | Halictidae/<br>fly      | 120h   | 2010. 08                     | MH117676 | MH116782 | MH116328 |
| Rosaceae       | <i>Rosa soulieana</i>           |                              | 654.2 | 1  | 5.0  | 1  | 27.8 | 20 | 264380 | 20 | Yes | Yes | bumblebee               | 2h     | 2019.08                      | HM593907 | FJ472529 |          |
| Rosaceae       | <i>Spenceria ramalana</i>       |                              | 53.0  | 21 | 4.0  | 1  | 21.9 | 20 | 154615 | 20 | Yes | Yes | Halictidae              | 120h   | 2010. 08                     | MF786823 |          | KX527087 |

|               |                          |                        |       |   |      |   |      |   |       |    |     |    |            |      |         |          |          |          |
|---------------|--------------------------|------------------------|-------|---|------|---|------|---|-------|----|-----|----|------------|------|---------|----------|----------|----------|
| Thymelaeaceae | <i>Daphne aurantiaca</i> | <i>Daphne laureola</i> | 61.48 | 1 | 10.6 | 1 | 31.5 | 5 | 8059  | 20 | Yes | No | moth       | 1.5h | 2019.08 | GQ167542 | JN894952 | HM849946 |
| Violaceae     | <i>Viola delavayi</i>    |                        | 178.3 | 1 | 1.5  | 3 | 40.0 | 5 | 18949 | 20 | No  | No | Halictidae | > 4h | 2019.08 | FJ002908 |          |          |

Outgroup

Magnoliaceae *Tasmannia lanceolata*

AY004128 AF543735 AY298851

Table S3. The results of trait correlations from 22 publications between pollen size and style length or stigma depth, and/or flower size, or pollen number. The phylogenetic independent contrast (PIC) analysis and measurement of flower size were involved only in a few lineages.

| Authors              | Year | Family or taxon                   | PIC analysis<br>in pollen size | Style length              | Flower<br>size | Stigma<br>depth | Pollen<br>number |
|----------------------|------|-----------------------------------|--------------------------------|---------------------------|----------------|-----------------|------------------|
| Germeraad et al.     | 1968 | Sonneratiaceae                    |                                | No                        |                |                 |                  |
| Baker & Baker        | 1979 | 124 families                      |                                | Positive                  |                |                 |                  |
| Ganders              | 1979 | 24 families                       |                                | No                        |                |                 |                  |
| Cruden & Miller-Ward | 1981 | 10 families                       |                                | No                        |                |                 |                  |
| Baker & Baker        | 1982 | Onagraceae                        |                                | Positive                  |                |                 |                  |
| Plitmann & Levin     | 1983 | Polemoniaceae                     |                                | Positive                  |                |                 |                  |
| Cruden & Lyon        | 1985 | Umbellifer, Crucifera, Solanaceae |                                | No                        |                | Positive        |                  |
|                      |      | Polygonaceae                      |                                | Positive                  |                | Positive        |                  |
| Williams & Rouse     | 1990 | Ericaceae                         |                                | Positive                  |                |                 |                  |
| Kirk                 | 1993 | Asteraceae                        |                                | Positive                  |                |                 |                  |
| Vonhof & Harder      | 1995 | Fabaceae                          | Yes                            |                           |                |                 | Negative         |
| Harder               | 1998 | 11 families                       |                                | Positive                  | Positive       |                 | Negative         |
| Stroo                | 2000 | 64 families                       |                                | Positive                  |                |                 |                  |
| Torres               | 2000 | Asteraceae                        |                                | Positive                  |                |                 |                  |
| Sarkissian & Harder  | 2001 | <i>Brassica rapa</i>              |                                |                           |                |                 | Negative         |
| Aguilar et al.       | 2002 | Solanaceae                        |                                | Positive                  |                |                 | No               |
| Yang & Guo           | 2004 | Orobanchaceae                     |                                | Positive                  |                |                 | Negative         |
| Lopez et al.         | 2006 | Nyctaginaceae                     |                                | Positive<br>(with starch) |                |                 | No               |
|                      |      | Nyctaginaceae                     |                                | No<br>(with lipids)       |                |                 | No               |
| Cruden               | 2009 | Fabaceae                          |                                | No                        | No             | Positive        |                  |
|                      |      | Proteaceae                        |                                |                           | Positive       |                 |                  |
| Bedinger et al.      | 2011 | Solanaceae                        |                                |                           |                |                 | No               |
| Jurgens et al.       | 2012 | Caryophylloideae                  | Yes                            | Positive                  |                |                 | No               |
| Wang et al.          | 2016 | Orobanchaceae                     | Yes                            | Positive                  | Positive       | Positive        |                  |
| Wu et al.            | 2017 | <i>Fagopyrum</i>                  | Yes                            | No                        |                | Positive        |                  |

## References

- Aguilar R, Bernardello G, Galetto L. 2002. Pollen-pistil relationships and pollen size-number trade-off in species of the tribe Lycieae (Solanaceae). *Journal of Plant Research* 115, 335-340.
- Baker HG, Baker I. 1979. Starch in angiosperm pollen grains and its evolutionary significance. *American Journal of Botany* 66, 59-1400.
- Baker HG, Baker I. 1982. Starchy and starchless pollen in the Onagraceae. *Annals of the Missouri Botanical Garden* 69, 748-754.
- Bedinger PA, Chetelat RT, McClure B, Moyle LC, Rose JKC, Stack SM, et al. 2011. Interspecific reproductive barriers in the tomato clade: opportunities to decipher mechanisms of reproductive isolation. *Sexual Plant Reproduction* 24, 171-187.
- Cruden RW, Lyon DL. 1985. Correlations among stigma depth, style length, and pollen grain size: do they reflect function or phylogeny? *Botanical Gazette* 146, 143-149.
- Cruden RW, Miller-Ward S. 1981. Pollen-ovule ratio, pollen size, and the ratio of stigmatic area to the pollen-bearing area of the pollinator: a hypothesis. *Evolution* 35, 964-974.
- Cruden RW. 2009. Pollen grain size, stigma depth, and style length: the relationships revisited. *Plant Systematics and Evolution* 278, 223-238.
- Ganders FR. 1979. The biology of heterostyly. *New Zealand Journal of Botany* 17, 607-635.
- Germeraad JH, Hopping CA, Muller J. 1968. Palynology of Tertiary sediments from tropical areas. *Review of Palaeobotany and Palynology* 6, 189-348.
- Harder LD. 1998. Pollen-size comparisons among animal-pollinated angiosperms with different pollination characteristics. *Biological Journal of the Linnean Society* 64, 513-525.
- Jürgens A, Witt T, Gottsberger G. 2012. Pollen grain size variation in Caryophylloideae: a mixed strategy for pollen deposition along styles with long stigmatic areas? *Plant Systematics and Evolution* 298, 9-24.
- Kirk WD. 1993. Interspecific size and number variation in pollen grains and seeds. *Biological Journal of the Linnean Society* 49, 239-248.
- Lopez HA, Anton AM, Galetto L. 2005. Pollen-pistil size correlation and pollen size-number trade-off in species of Argentinian Nyctaginaceae with different pollen reserves. *Plant Systematics and Evolution* 256, 69-73.
- Plitmann U, Levin DA. 1983. Pollen-Pistil Relationships in the Polemoniceae. *Evolution*, 37, 957-967.
- Sarkissian TS, Harder LD. 2001. Direct and indirect responses to selection on pollen size in *Brassica rapa* L. *Journal of Evolutionary Biology* 14, 456-468.
- Stroo, Arjan. 2000. Pollen Morphological Evolution in Bat Pollinated Plants. *Plant Systematics and Evolution* 222, 225-242.
- Torres C. 2000. Pollen size evolution: correlation between pollen volume and pistil length in Asteraceae. *Sexual Plant Reproduction* 12, 365-370.
- Vonhof MJ, Harder LD. 1995. Size-number trade-offs, and pollen production by Papilionaceous Legumes. *American Journal of Botany* 82, 230-238.
- Wang XP, Yu WB, Sun SG, Huang SQ. 2016. Pollen size strongly correlates with stigma depth among *Pedicularis* species. *Journal of Integrative Plant Biology* 58, 818-821.
- Williams EG, Rouse JL. 1990. Relationships of pollen size, pistil length and pollen tube growth rates in *Rhododendron* and their influence on hybridization. *Sexual Plant Reproduction* 3, 7-17.
- Wu LY, Wang B, Schoen DJ, Huang SQ. 2017. Transitions from distyly to homostyly are associated with floral evolution in the buckwheat genus (*Fagopyrum*). *American Journal of Botany* 104, 1232-1240.
- Yang CF, Guo YH. 2004. Pollen size-number trade-off and pollen-pistil relationships in *Pedicularis* (Orobanchaceae). *Plant Systematics and Evolution* 247, 177-185
